# Supplementary material
Source: PubMed Central journal article supplement (PMC4136563)
Supplement: 1404176111_pnas.1404176111.sapp.pdf [file 1404176111_pnas.1404176111.sapp.pdf]

## Supporting Information Appendix: Experimental Evolution of Prepared Learning

### 1. Details of the Modeling

This model is logically similar to the model described in Dunlap & Stephens 2009, where we considered the effects of information reliability and certainty on whether selection should favor the evolution of learning or of an unlearned preference. Here we consider how the reliabilities of two modalities of stimuli affect how selection favors which modality animals should learn about best. Flies experience pairings of two modalities of stimuli: odor (denoted by roman letters), and color (denoted by greek letters). There are two odors and two colors. To make this explicitly the same as the experiment, we can say that for the odors stimulus A is amyl acetate and stimulus B is benzaldehyde, and that for the colors,  $\alpha$  is aqua, and  $\beta$  is blue.

We imagine a learning scenario where individuals use quinine (Q), as an aversive unconditioned stimulus and the odor and color as potential conditioned stimuli. As with our experiment, flies experience two phases: an experience phase and a consequence phase.

There are four possible pairings with quinine in the experience phase:

$$Q+A\alpha \text{ or } Q+B\beta \text{ or } Q+A\beta \text{ or } Q+B\alpha$$

The probabilities of quinine being placed with A or B, or  $\alpha$  or  $\beta$ , are independent. We can define these probabilities as  $P(Q+A) = a$ , and  $P(Q+B) = 1-a$ ; and  $P(Q+\alpha) = b$ , and  $P(Q+\beta) = 1-b$ .

Now we define the possible outcomes in the consequence phase (Table S1).

**Table S1.** Table of all possible outcomes in the consequence phase.

| Roman/Color Best              |                                                         | Greek/Odor Best                    |
|-------------------------------|---------------------------------------------------------|------------------------------------|
| $P(A \text{ best} Q+A\alpha)$ | Neither Predict                                         | $P(\alpha \text{ best} Q+A\alpha)$ |
| $P(B \text{ best} Q+B\beta)$  |                                                         | $P(\beta \text{ best} Q+B\beta)$   |
| $P(B \text{ best} Q+A\alpha)$ | Both Predict                                            | $P(\beta \text{ best} Q+A\alpha)$  |
| $P(A \text{ best} Q+B\beta)$  |                                                         | $P(\alpha \text{ best} Q+B\beta)$  |
| $P(B \text{ best} Q+A\beta)$  | Color (greek) predicts,<br>but odor (roman) does<br>not | $P(\alpha \text{ best} Q+A\beta)$  |
| $P(A \text{ best} Q+B\alpha)$ |                                                         | $P(\beta \text{ best} Q+B\alpha)$  |
| $P(A \text{ best} Q+A\beta)$  | Odor predicts, but color<br>does not                    | $P(\beta \text{ best} Q+A\beta)$   |
| $P(B \text{ best} Q+B\alpha)$ |                                                         | $P(\alpha \text{ best} Q+B\alpha)$ |

## Supporting Information Appendix: Experimental Evolution of Prepared Learning

These simplify into 2 independent probabilities: the probability that olfactory stimuli predict the best environment in the consequence phase, given any previous pairing in the experience phase,  $P(\text{olfactory best} \mid \text{any pairing})$ , and the probability that color stimuli predict the best environment,  $P(\text{color best} \mid \text{any pairing})$ .

We then assign a probability to the reliability of each stimulus with regards to the quinine pairing predicting the best environment, where  $O$  is the probability odor predicts the best environment, and  $C$  is the probability color predicts the best environment. We define the number of eggs oviposited by the female in the consequence phase as  $N$ , the error rate for the female as  $\varepsilon$  (with  $1-\varepsilon$  being the eggs she lays in the substrate she “prefers”), and  $r$  being the proportion of eggs which survive to adulthood (with zero surviving on the “bad” media).

There are 16 different combinations possible of experience phase pairings and consequence phase outcome (Table S2).

**Table S2.** Possible pairings and outcomes in the two stimulus modality system.

| Experience Phase | Probability of Pairings | Consequence Phase   | Probability of “Best” | Selective Learning to Roman | Selective Learning to Greek |
|------------------|-------------------------|---------------------|-----------------------|-----------------------------|-----------------------------|
| Q+A $\alpha$     | $ab$                    | Roman only predicts | $O(1-C)$              | $r(1-\varepsilon)N$         | $r\varepsilon N$            |
| Q+B $\beta$      | $(1-a)(1-b)$            |                     |                       |                             |                             |
| Q+A $\beta$      | $a(1-b)$                |                     |                       |                             |                             |
| Q+B $\alpha$     | $(1-a)b$                |                     |                       |                             |                             |
| Q+A $\alpha$     | $ab$                    | Greek only predicts | $C(1-O)$              | $r\varepsilon N$            | $r(1-\varepsilon)N$         |
| Q+B $\beta$      | $(1-a)(1-b)$            |                     |                       |                             |                             |
| Q+A $\beta$      | $a(1-b)$                |                     |                       |                             |                             |
| Q+B $\alpha$     | $(1-a)b$                |                     |                       |                             |                             |
| Q+A $\alpha$     | $ab$                    | Both Predict        | $CO$                  | $r(1-\varepsilon)N$         | $r(1-\varepsilon)N$         |
| Q+B $\beta$      | $(1-a)(1-b)$            |                     |                       |                             |                             |
| Q+A $\beta$      | $a(1-b)$                |                     |                       |                             |                             |
| Q+B $\alpha$     | $(1-a)b$                |                     |                       |                             |                             |
| Q+A $\alpha$     | $ab$                    | Neither Predict     | $(1-C)(1-O)$          | $r\varepsilon N$            | $r\varepsilon N$            |
| Q+B $\beta$      | $(1-a)(1-b)$            |                     |                       |                             |                             |
| Q+A $\beta$      | $a(1-b)$                |                     |                       |                             |                             |
| Q+B $\alpha$     | $(1-a)b$                |                     |                       |                             |                             |

## Supporting Information Appendix: Experimental Evolution of Prepared Learning

We can now calculate the fitnesses for each of the two types of learners. We do this using the geometric mean. The fitness for the roman only learner (learning about odor only) is

$$ab O(1-C)\ln r(1-\varepsilon)N + (1-a)(1-b) O(1-C)\ln r(1-\varepsilon)N + a(1-b) O(1-C)\ln r(1-\varepsilon)N + (1-a)b O(1-C)\ln r(1-\varepsilon)N + ab C(1-O)\ln r\varepsilon N + (1-a)(1-b) C(1-O)\ln r\varepsilon N + a(1-b) C(1-O)\ln r\varepsilon N + (1-a)b C(1-O)\ln r\varepsilon N + ab CO \ln r(1-\varepsilon)N + (1-a)(1-b) CO \ln r(1-\varepsilon)N + a(1-b) CO \ln r(1-\varepsilon)N + (1-a)b CO \ln r(1-\varepsilon)N + ab (1-C)(1-O)\ln r\varepsilon N + (1-a)(1-b) (1-C)(1-O)\ln r\varepsilon N + a(1-b) (1-C)(1-O)\ln r\varepsilon N + (1-a)b(1-C)(1-O)\ln r\varepsilon N$$

The fitness for the greek-only learner (learning about color only) is

$$ab O(1-C)\ln r\varepsilon N + (1-a)(1-b) O(1-C)\ln r\varepsilon N + a(1-b) O(1-C)\ln r\varepsilon N + (1-a)b O(1-C)\ln r\varepsilon N + ab C(1-O)\ln r(1-\varepsilon)N + (1-a)(1-b) C(1-O)\ln r(1-\varepsilon)N + a(1-b) C(1-O)\ln r(1-\varepsilon)N + (1-a)b C(1-O)\ln r(1-\varepsilon)N + ab CO \ln r(1-\varepsilon)N + (1-a)(1-b) CO \ln r(1-\varepsilon)N + a(1-b) CO \ln r(1-\varepsilon)N + (1-a)b CO \ln r(1-\varepsilon)N + ab (1-C)(1-O)\ln r\varepsilon N + (1-a)(1-b) (1-C)(1-O)\ln r\varepsilon N + a(1-b) (1-C)(1-O)\ln r\varepsilon N + (1-a)b(1-C)(1-O)\ln r\varepsilon N$$

## 2. Details on the stimuli

To avoid any effects of chemical detection of food coloring or dye agents, we used 100mm diameter circles of color placed under each 100mm diameter petri dish of clear agar. To choose the colors, we conducted an extensive series of pilot studies to determine that 1) flies would discriminate between the colors chosen, as evidenced by discrimination learning, and 2) flies showed no strong preference between the chosen colors. The colors we used in the experiment were aqua and cobalt blue acrylic poster paint from Dick Blick Art Supplies, which we painted onto white cardstock.

Through an additional series of pilot studies, we then titrated the amount of odorants such that learning about the olfactory cues did not completely overshadow learning about the color cues. Additionally, we balanced the preference across the two olfactory cues chosen.

## Supporting Information Appendix: Experimental Evolution of Prepared Learning

### 3. Treatments and Generation Assignments

Prior to the experiment, we randomly assigned all the quinine pairings and selected substrates for each line. Figure S1 shows some example of how these pairings could occur using the color stimuli of aqua and blue (equivalent to A and B in the model) and the olfactory stimuli of amyl acetate (AA) and benzaldehyde (BZ) (equivalent to  $\alpha$  and  $\beta$  in the model).

**Figure S1.** Example of possible pairings. Assume the best environment is indicated by the box with the dashed lines. In the first possibility, when paired with quinine, both aqua and AA reliably predict the best environment (Blue/BZ). In the second possibility, only the pairing of AA with quinine predicts the best environment (BZ); an individual attending to/ learning the aqua pairing would be making an incorrect choice. There are two additional possibilities: that aqua, but not AA predicts, and that neither predict.

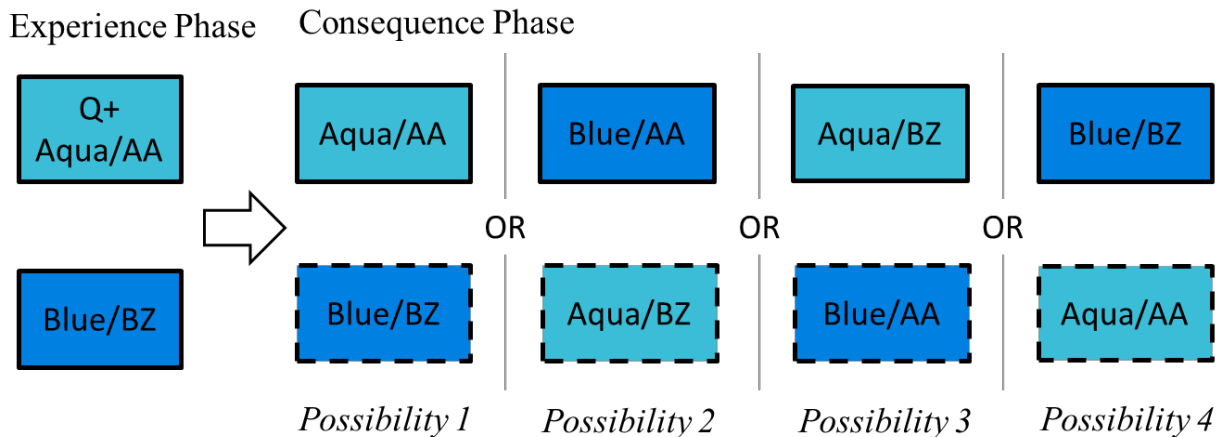

We assigned a probability to the reliability of each stimulus with regards to how the quinine pairing predicted the best environment, where  $O$  was the probability the odor pairing predicted the best environment, and  $C$  was the probability that the color pairing predicted the best environment. By manipulating the quinine pairings and where we reared the eggs from, we created different patterns of reliability. For instance, in treatments where a modality had a reliability of 1.0, that modality always correctly predicted the best environment; in treatments where a modality had a reliability of 0.5, it predicted the best environment correctly in half of the generations (and incorrectly the other half of the generations).

To better explain this, the following tables give examples of how these assignments work in practice.

## Supporting Information Appendix: Experimental Evolution of Prepared Learning

**Table S3.** This table shows a sample assignment for a line in the treatment where both modalities are reliable ( $C = 1.0$ ,  $O = 1.0$ ). The specific odor and color pairing remain identical during both phases.

| Generation | Quinine with |    | Best Environment |    |
|------------|--------------|----|------------------|----|
|            |              |    | Blue             | AA |
| 1          | Aqua         | BZ | Blue             | AA |
| 2          | Blue         | AA | Aqua             | BZ |
| 3          | Aqua         | BZ | Blue             | AA |
| 4          | Blue         | AA | Aqua             | BZ |
| 5          | Blue         | BZ | Aqua             | AA |
| 6          | Aqua         | AA | Blue             | BZ |
| 7          | Aqua         | AA | Blue             | BZ |
| 8          | Blue         | BZ | Aqua             | AA |
| 9          | Blue         | AA | Aqua             | BZ |
| 10         | Aqua         | BZ | Blue             | AA |

**Table S4.** This table shows a sample assignment where one modality is reliable, but the other is unreliable. In this case, color is unreliable and the generations where the odor+quinine pairings incorrectly indicate the best environment are indicated in red. In this case, during some generations, the specific color and odor pairs can change between the two experimental phases.

| Generation | Quinine with |    | Best Environment |    |
|------------|--------------|----|------------------|----|
|            |              |    | Blue             | AA |
| 1          | Aqua         | BZ | Blue             | AA |
| 2          | Blue         | AA | Blue             | BZ |
| 3          | Aqua         | BZ | Aqua             | AA |
| 4          | Blue         | AA | Aqua             | BZ |
| 5          | Blue         | BZ | Blue             | AA |
| 6          | Aqua         | AA | Blue             | BZ |
| 7          | Aqua         | AA | Aqua             | BZ |
| 8          | Blue         | BZ | Aqua             | AA |
| 9          | Blue         | AA | Aqua             | BZ |
| 10         | Aqua         | BZ | Blue             | AA |

We randomized assignments in blocks of two generations to ensure 1) an equal balance of the stimuli being paired with quinine and then serving as the best environment, and 2) to avoid runs of multiple generations with repeated assignments of a particular stimulus. Each of these was randomized and assigned independently.

## Supporting Information Appendix: Experimental Evolution of Prepared Learning

### 4. ANOVA Tables for the Graphs in the Paper

The first set of tables is the full ANOVA tables corresponding to the analyses described in the paper.

**Table S5.** ANOVA table corresponding to Figure 2 in the paper. This is a repeated measure ANOVA on the learning scores for the **Odor**-quinine pairing, with effects of color reliability and odor reliability. The repeated measures are the learning scores for the two time points compared: the mean of the first two generations and last mean of the last two generations (denoted as Time in the table). This analysis focuses on the overall change across the entire experiment. Red values indicate statistically significant effects.

| Effect          | Repeated Measures Analysis of Variance (Follow Odor in Selection Data RM.stw)<br>Sigma-restricted parameterization<br>Effective hypothesis decomposition |                  |          |          |          |
|-----------------|----------------------------------------------------------------------------------------------------------------------------------------------------------|------------------|----------|----------|----------|
|                 | SS                                                                                                                                                       | Degr. of Freedom | MS       | F        | p        |
| Intercept       | 25.73526                                                                                                                                                 | 1                | 25.73526 | 2387.494 | 0.000000 |
| color           | 0.00533                                                                                                                                                  | 1                | 0.00533  | 0.494    | 0.486492 |
| odor            | 0.04476                                                                                                                                                  | 1                | 0.04476  | 4.153    | 0.048970 |
| color*odor      | 0.00193                                                                                                                                                  | 1                | 0.00193  | 0.179    | 0.674610 |
| Error           | 0.38805                                                                                                                                                  | 36               | 0.01078  |          |          |
| TIME            | 0.00122                                                                                                                                                  | 1                | 0.00122  | 0.116    | 0.735089 |
| TIME*color      | 0.00002                                                                                                                                                  | 1                | 0.00002  | 0.002    | 0.962383 |
| TIME*odor       | 0.04649                                                                                                                                                  | 1                | 0.04649  | 4.421    | 0.042553 |
| TIME*color*odor | 0.00425                                                                                                                                                  | 1                | 0.00425  | 0.404    | 0.528943 |
| Error           | 0.37859                                                                                                                                                  | 36               | 0.01052  |          |          |

**Supporting Information Appendix: Experimental Evolution of Prepared Learning**

**Table S6.** ANOVA table corresponding to Figure 3 in the paper. This is a repeated measure ANOVA on the learning scores for the **Color**-quinine pairing, with effects of color reliability and odor reliability. The repeated measures are the learning scores for the two time points compared: the mean of the first two generations and the mean of the last two generations (denoted as Time in the table). This analysis focuses on the overall change across the entire experiment. Red values indicate statistically significant effects.

| Repeated Measures Analysis of Variance (Follow Color in Selection Data RM.stw)<br>Sigma-restricted parameterization<br>Effective hypothesis decomposition |          |                  |          |          |          |
|-----------------------------------------------------------------------------------------------------------------------------------------------------------|----------|------------------|----------|----------|----------|
| Effect                                                                                                                                                    | SS       | Degr. of Freedom | MS       | F        | p        |
| Intercept                                                                                                                                                 | 24.72944 | 1                | 24.72944 | 3307.253 | 0.000000 |
| color                                                                                                                                                     | 0.05367  | 1                | 0.05367  | 7.177    | 0.011059 |
| odor                                                                                                                                                      | 0.00031  | 1                | 0.00031  | 0.041    | 0.841048 |
| color*odor                                                                                                                                                | 0.00044  | 1                | 0.00044  | 0.058    | 0.810494 |
| Error                                                                                                                                                     | 0.26918  | 36               | 0.00748  |          |          |
| TIME                                                                                                                                                      | 0.00036  | 1                | 0.00036  | 0.027    | 0.870091 |
| TIME*color                                                                                                                                                | 0.05807  | 1                | 0.05807  | 4.378    | 0.043527 |
| TIME*odor                                                                                                                                                 | 0.01642  | 1                | 0.01642  | 1.238    | 0.273307 |
| TIME*color*odor                                                                                                                                           | 0.00269  | 1                | 0.00269  | 0.203    | 0.655315 |
| Error                                                                                                                                                     | 0.47751  | 36               | 0.01326  |          |          |

**Table S7.** ANOVA table corresponding to Figure 4 in the paper. This is a 2x2 factorial ANOVA, with factors of odor reliability and color reliability. The response variable is the proportion of eggs consistent with learning about the odor-quinine pairing. Red values indicate statistically significant effects.

| Univariate Tests of Significance for follow color (Modes Alone) in Assay Data<br>Sigma-restricted parameterization<br>Effective hypothesis decomposition |          |                  |          |          |          |
|----------------------------------------------------------------------------------------------------------------------------------------------------------|----------|------------------|----------|----------|----------|
| Effect                                                                                                                                                   | SS       | Degr. of Freedom | MS       | F        | p        |
| Intercept                                                                                                                                                | 13.43271 | 1                | 13.43271 | 527.0866 | 0.000000 |
| color reliable                                                                                                                                           | 0.10677  | 1                | 0.10677  | 4.1896   | 0.048026 |
| odor reliable                                                                                                                                            | 0.00107  | 1                | 0.00107  | 0.0420   | 0.838851 |
| color reliable*odor reliable                                                                                                                             | 0.08755  | 1                | 0.08755  | 3.4354   | 0.072021 |
| Error                                                                                                                                                    | 0.91745  | 36               | 0.02548  |          |          |

## Supporting Information Appendix: Experimental Evolution of Prepared Learning

**Table S8.** ANOVA table corresponding to Figure 5 in the paper. This is a 2x2 factorial ANOVA, with factors of odor reliability and color reliability. The response variable is the proportion of eggs consistent with learning about the odor-quinine pairing. Red values indicate statistically significant effects.

| Effect                       | Univariate Tests of Significance for follow odor (Modes Alone) in Assay Data<br>Sigma-restricted parameterization<br>Effective hypothesis decomposition |                  |          |          |          |
|------------------------------|---------------------------------------------------------------------------------------------------------------------------------------------------------|------------------|----------|----------|----------|
|                              | SS                                                                                                                                                      | Degr. of Freedom | MS       | F        | p        |
| Intercept                    | 15.98129                                                                                                                                                | 1                | 15.98129 | 738.0364 | 0.000000 |
| color reliable               | 0.00182                                                                                                                                                 | 1                | 0.00182  | 0.0841   | 0.773536 |
| odor reliable                | 0.17070                                                                                                                                                 | 1                | 0.17070  | 7.8829   | 0.008009 |
| color reliable*odor reliable | 0.00496                                                                                                                                                 | 1                | 0.00496  | 0.2289   | 0.635230 |
| Error                        | 0.77954                                                                                                                                                 | 36               | 0.02165  |          |          |

### 5. Fine-Scaled Analysis of the Selection Data

The following analyses take into account learning scores throughout the experiment. Given the incredibly large numbers of eggs and petri dishes to count, the following data were all counted using a script we wrote for ImageJ, which assesses the total area of a petri dish covered with eggs. We then converted this area to an estimated number of eggs using a polynomial equation. To obtain this equation, we took a series of petri dishes with a known quantity of eggs, counted the area in ImageJ, and then fitted a predictive function with a high r-square value (0.997). This method accounts quite well for clumps of eggs, but is not as accurate as the human eye.

For the statistical analyses, we combine generations into blocks of 2 (corresponding to the randomization scheme of the experiment). For clarity in the graphs, we combine generations into blocks of 4 generations each.



## Supporting Information Appendix: Experimental Evolution of Prepared Learning

**Figure S2.** This graph shows the proportion of eggs laid on the substrate consistent with learning about odor cues. We show the means across blocks of 4 generations each. Variance is high, as combinations of odors, colors, and quinine pairings are different across the lines at any given time, due to the experimental treatments each generation. This is why we conduct separate learning tests at the end of the experiment, to give each line an identical series of tests.

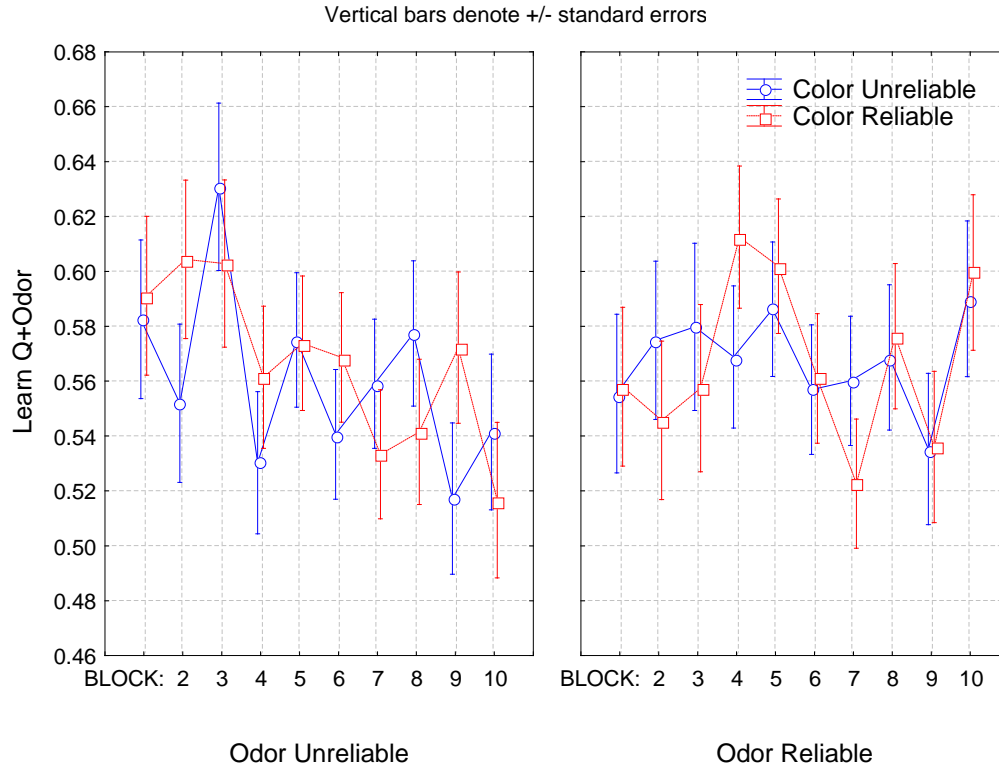

**Supporting Information Appendix: Experimental Evolution of Prepared Learning**

**Table S9.** Repeated measures ANOVA, with factors of color reliability and odor reliability. The repeated measure is of the blocks of 2 generations each (20 total blocks across 40 generations). To fit the assumptions of ANOVA, these data were arcsin transformed. Here we find a statistically significant interaction between the reliability and odor and the generations across the experiment. This is evident in Figure 2 above, where learning appears to decrease over time when odor is unreliable, but increases over time when odor is reliable. Red values indicate statistically significant effects.

| Repeated Measures Analysis of Variance (Follow Odor) in Selection Data RM |          |                  |          |          |          |
|---------------------------------------------------------------------------|----------|------------------|----------|----------|----------|
| Sigma-restricted parameterization                                         |          |                  |          |          |          |
| Effective hypothesis decomposition                                        |          |                  |          |          |          |
| Effect                                                                    | SS       | Degr. of Freedom | MS       | F        | p        |
| Intercept                                                                 | 581.3473 | 1                | 581.3473 | 20105.96 | 0.000000 |
| color                                                                     | 0.0013   | 1                | 0.0013   | 0.04     | 0.834000 |
| odor                                                                      | 0.0019   | 1                | 0.0019   | 0.07     | 0.799278 |
| color*odor                                                                | 0.0023   | 1                | 0.0023   | 0.08     | 0.778011 |
| Error                                                                     | 1.0409   | 36               | 0.0289   |          |          |
| Generation Block                                                          | 0.3044   | 19               | 0.0160   | 1.13     | 0.315619 |
| Generation Block*color                                                    | 0.1746   | 19               | 0.0092   | 0.65     | 0.869988 |
| Generation Block*odor                                                     | 0.5067   | 19               | 0.0267   | 1.88     | 0.013034 |
| Generation Block*color*odor                                               | 0.1483   | 19               | 0.0078   | 0.55     | 0.939449 |
| Error                                                                     | 9.7020   | 684              | 0.0142   |          |          |

**Table S10.** To confirm a difference between learning about odor-quinine pairings in the final generation block (generations 39 and 40), we ran a contrast within the ANOVA where we compare learning for lines in environments where odor is unreliable versus lines in environments where odor is reliable. The difference is statistically significant.

| Univariate Test of Significance for Planned Comparison (Follow Odor) in Selection Data |                |                  |             |          |          |
|----------------------------------------------------------------------------------------|----------------|------------------|-------------|----------|----------|
| Tests for transformed variables                                                        |                |                  |             |          |          |
| Variable                                                                               | Sum of Squares | Degr. of Freedom | Mean Square | F        | p        |
| M1                                                                                     | 0.093998       | 1                | 0.093998    | 9.874274 | 0.003347 |
| Error                                                                                  | 0.342703       | 36               | 0.009520    |          |          |

## Supporting Information Appendix: Experimental Evolution of Prepared Learning

**Figure S3.** This figure shows the learning about **Color**-quinine pairings, averaging across blocks of 4 generations each. This graph shows the proportion of eggs laid on the substrate consistent with learning about color cues. As with the previous figure, variance is high.

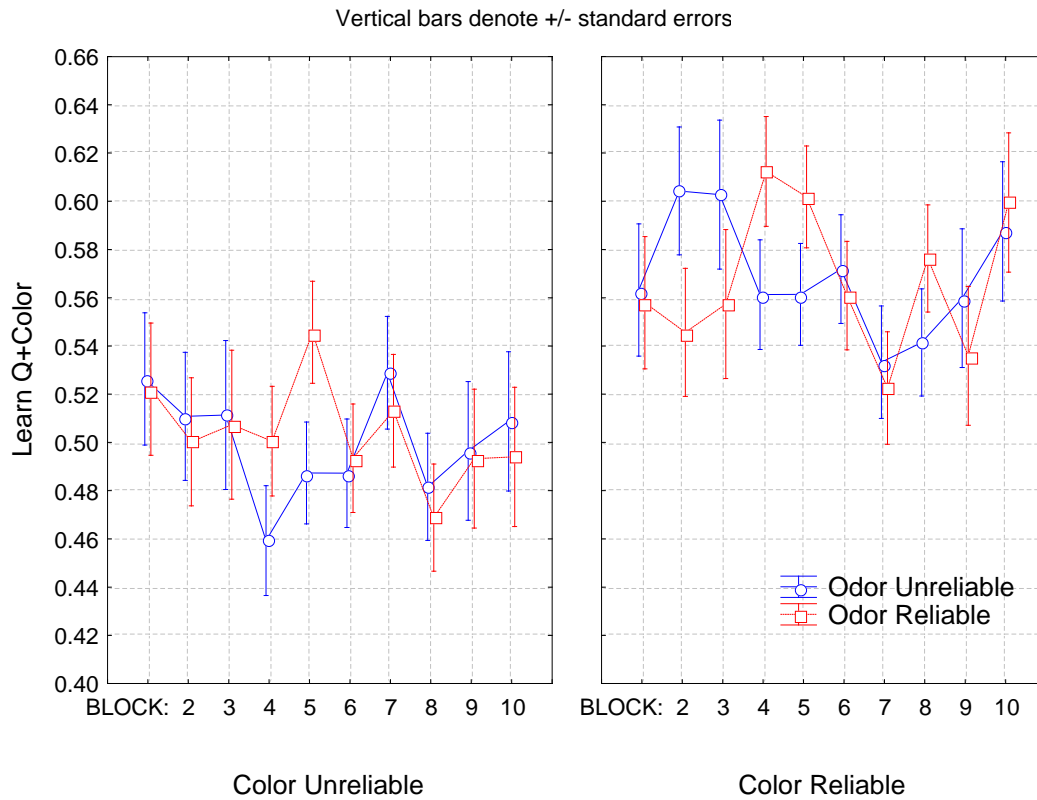

**Supporting Information Appendix: Experimental Evolution of Prepared Learning**

**Table S11.** Repeated measures ANOVA, with factors of color reliability and odor reliability. The repeated measure is on the blocks of 2 generations each (20 total blocks across 40 generations). To fit the assumptions of ANOVA, these data were arcsin transformed. Here we find a statistically significant effect of color reliability across the experiment. Unlike with the analysis with odor learning, we do not find a significant interaction with generation block, likely because for lines where color is unreliable, learning scores remain close to 50% throughout the experiment (they do not decline with time as with odor learning and odor unreliability).

| Repeated Measures Analysis of Variance (Follow Color) in Selection Data RM.stw) |          |                  |          |          |          |
|---------------------------------------------------------------------------------|----------|------------------|----------|----------|----------|
| Sigma-restricted parameterization                                               |          |                  |          |          |          |
| Effective hypothesis decomposition                                              |          |                  |          |          |          |
| Effect                                                                          | SS       | Degr. of Freedom | MS       | F        | p        |
| Intercept                                                                       | 539.6322 | 1                | 539.6322 | 27717.38 | 0.000000 |
| color                                                                           | 0.9208   | 1                | 0.9208   | 47.29    | 0.000000 |
| odor                                                                            | 0.0001   | 1                | 0.0001   | 0.01     | 0.942702 |
| color*odor                                                                      | 0.0013   | 1                | 0.0013   | 0.07     | 0.794920 |
| Error                                                                           | 0.7009   | 36               | 0.0195   |          |          |
| Generation Block                                                                | 0.1763   | 19               | 0.0093   | 0.71     | 0.814595 |
| Generation Block*color                                                          | 0.3012   | 19               | 0.0159   | 1.21     | 0.245296 |
| Generation Block*odor                                                           | 0.2507   | 19               | 0.0132   | 1.00     | 0.453725 |
| Generation Block*color*odor                                                     | 0.2258   | 19               | 0.0119   | 0.90     | 0.577675 |
| Error                                                                           | 8.9893   | 684              | 0.0131   |          |          |

**Table S12.** Contrast analysis to confirm a difference between learning about color-quinine pairings in the final generation block (generations 39 and 40). There is a statistically significant difference for learning scores in lines where color is reliable from lines where color is unreliable.

| Univariate Test of Significance for Planned Comparison (Follow Color) in Selection Data RM.stw) |                |                  |             |          |          |
|-------------------------------------------------------------------------------------------------|----------------|------------------|-------------|----------|----------|
| Tests for transformed variables                                                                 |                |                  |             |          |          |
| Variable                                                                                        | Sum of Squares | Degr. of Freedom | Mean Square | F        | p        |
| M1                                                                                              | 0.117229       | 1                | 0.117229    | 11.05189 | 0.002045 |
| Error                                                                                           | 0.381858       | 36               | 0.010607    |          |          |
